# Supplementary material for: Digging into protein metalation differences triggered by fluorine containing-dirhodium tetracarboxylate analogues
Source: Royal Society of Chemistry journal article supplement (doi:10.1039/d2dt00873d), 2022-01-01
Supplement: d2dt00873d1.pdf [file d2dt00873d1.pdf]

Supporting info

**Digging into protein metalation differences triggered by fluorine containing-dirhodium tetracarboxylate analogues**

Domenico Loreto,<sup>a</sup> Anna Esposito,<sup>b</sup> Nicola Demitri,<sup>c</sup> Annalisa Guaragna<sup>b</sup> and Antonello Merlino<sup>a\*</sup>

---

<sup>a.</sup> *Department of Chemical Sciences, University of Naples Federico II, Complesso Universitario di Monte Sant'Angelo, via Cinthia 21, 80126 Naples, Italy. E-mail: antonello.merlino@unina.it*

<sup>b.</sup> *Department of Chemical, Materials and Production Engineering, University of Naples Federico II, P.le V. Tecchio 80, 80125 Naples, Italy.*

<sup>c.</sup> *Elettra-Sincrotrone Trieste, S.S. 14 km 163.5 in Area Science Park, 34149 Trieste, Italy*

### Synthesis and characterization of $[\text{Rh}_2(\text{OAc})(\text{tfa})_3]$

$[\text{Rh}_2(\text{OAc})(\text{tfa})_3]$  was prepared as described in Scheme S1 as previously reported [1,2].

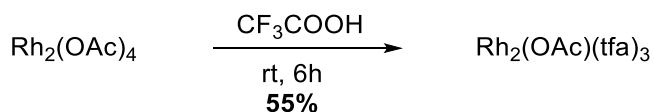

**Scheme S1.** Synthesis of  $[\text{Rh}_2(\text{OAc})(\text{tfa})_3]$

$\text{Rh}_2(\text{OAc})_4$  (17.5 mg, 0.039 mmol) was dissolved in an excess of trifluoroacetic acid, (2 mL). The resulting teal-blue solution was stirred at room temperature for 6h. Afterwards, the mixture was concentrated under reduced pressure. Chromatography of the crude residue over silica gel (toluene/ $\text{CH}_3\text{CN}$  = 99:1) afforded the pure  $[\text{Rh}_2(\text{OAc})(\text{tfa})_3]$  (13.1 mg, 55% yield) as blue powder along with the expected  $[\text{cis-Rh}_2(\text{OAc})_2(\text{tfa})_2]$ . Analytical data including NMR spectra were consistent with those reported elsewhere.[1]

Data for  $[\text{Rh}_2(\text{OAc})(\text{tfa})_3]$ :  $^1\text{H}$  NMR (400 MHz,  $\text{CDCl}_3$ ):  $\delta$  = 2.63 (s, coordinated  $\text{CH}_3\text{CN}$ ), 2.02 (s, 3H).  $^{19}\text{F}$   $\{^1\text{H dec}\}$  NMR (376 MHz,  $\text{CDCl}_3$ ):  $\delta$  = -74.7, -74.9 (Figure S1A).

Data for  $[\text{cis-Rh}_2(\text{OAc})_2(\text{tfa})_2]$ :  $^1\text{H}$  NMR (400 MHz,  $\text{CDCl}_3$ ):  $\delta$  = 2.52 (s, coordinated  $\text{CH}_3\text{CN}$ ), 1.99 (s, 6H).  $^{19}\text{F}$   $\{^1\text{H dec}\}$  NMR (376 MHz,  $\text{CDCl}_3$ ):  $\delta$  = -74.7 (Figure S1B).

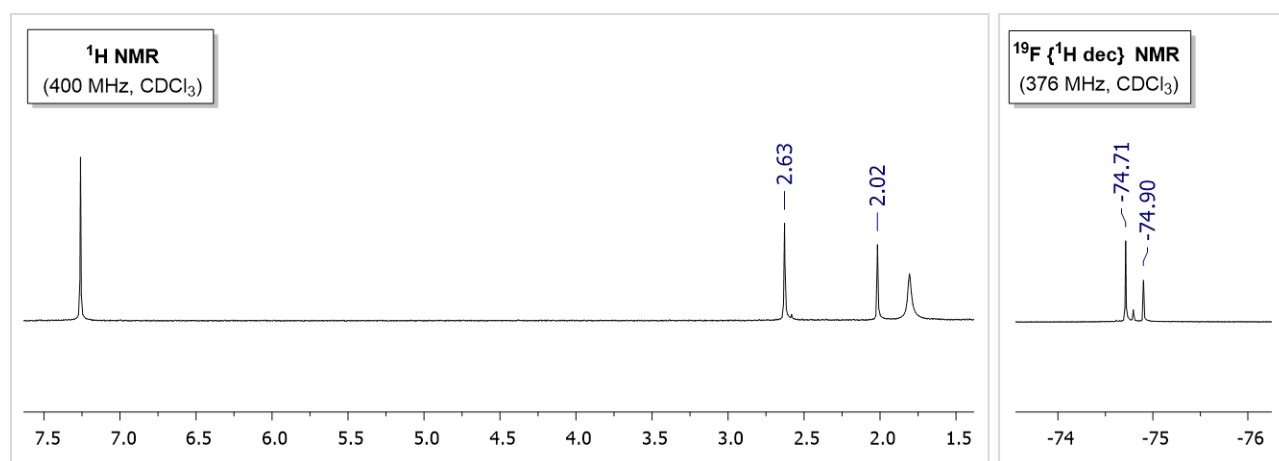

**A**

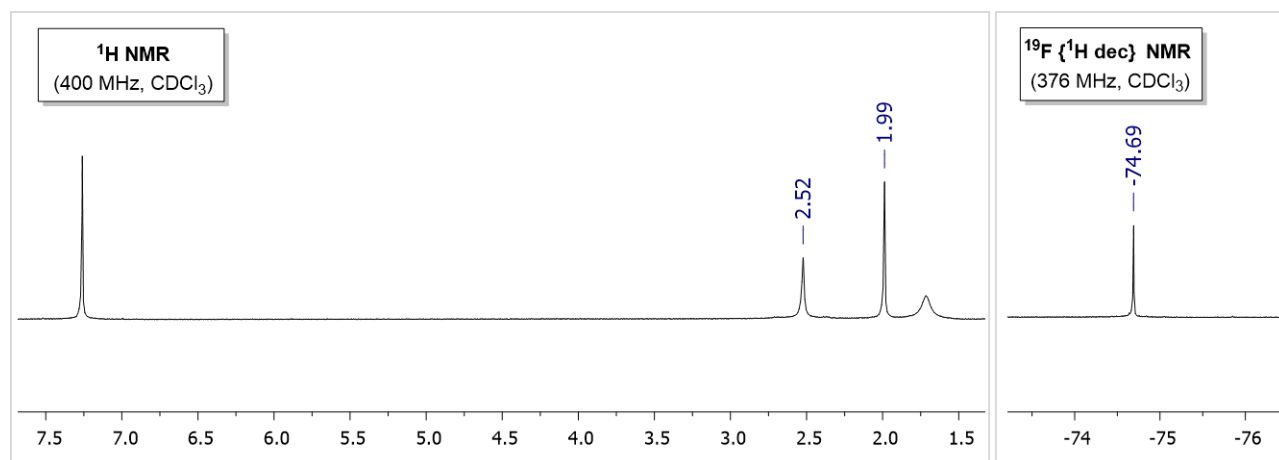

**B**

**Figure S1** Copies of  $^1\text{H}$  and  $^{19}\text{F}$  NMR spectra for  $[\text{Rh}_2(\text{OAc})(\text{tfa})_3]$  (panel A) and  $[\text{cis-Rh}_2(\text{OAc})_2(\text{tfa})_2]$  (panel B).

### *<sup>19</sup>F NMR spectra*

<sup>19</sup>F NMR spectra were recorded at 25 °C using Bruker AVANCE spectrometer (Billerica, Massachusetts, US) operating at 376 MHz with TOPSPIN using autolocking and auto shimming. Chemical shifts ( $\delta$ ) are reported in parts per million (ppm). Spectra were acquired in 10.0 mM sodium citrate pH 5.1 and in 5.0 mM HEPES pH 7.5 (10% D<sub>2</sub>O) using 0.5 mM of the metal complex in the absence and in the presence of RNase A and HEWL, respectively (protein to metal molar ratio 1:1). The spectra were referenced with pure trifluoroacetic acid (TFA) in the same buffer solutions (10.0 mM sodium citrate 10% D<sub>2</sub>O at pH 5.1 and 5.0 mM HEPES 10% D<sub>2</sub>O at pH 7.5).

<sup>19</sup>F {<sup>1</sup>H dec} NMR data in 10 mM sodium citrate buffer 10% D<sub>2</sub>O at pH 5.1.

[Rh<sub>2</sub>(OAc)(tfa)<sub>3</sub>] t = 5':  $\delta$  = -75.5, -74.8, -74.7, -74.6 ppm.

[Rh<sub>2</sub>(OAc)(tfa)<sub>3</sub>] t = 4 h:  $\delta$  = -75.5, -74.6 ppm.

[Rh<sub>2</sub>(OAc)(tfa)<sub>3</sub>] t = 24 h:  $\delta$  = -75.5, -74.6 ppm.

[Rh<sub>2</sub>(OAc)(tfa)<sub>3</sub>] with RNase A: t = 5'  $\delta$  = -75.5 ppm.

Trifluoroacetic Acid (TFA):  $\delta$  = -75.5 ppm.

<sup>19</sup>F {<sup>1</sup>H dec} NMR data in 5 mM HEPES buffer 10% D<sub>2</sub>O at pH 7.5.

[Rh<sub>2</sub>(OAc)(tfa)<sub>3</sub>] t = 5':  $\delta$  = -75.5, -74.8, -74.7 ppm.

[Rh<sub>2</sub>(OAc)(tfa)<sub>3</sub>] t = 4 h:  $\delta$  = -75.5, -75.1, -74.8, -74.7 ppm.

[Rh<sub>2</sub>(OAc)(tfa)<sub>3</sub>] t = 24 h:  $\delta$  = -75.5, -75.1, -74.7 ppm.

[Rh<sub>2</sub>(OAc)(tfa)<sub>3</sub>] with HEWL: t = 5'  $\delta$  = -74.7, -75.5 ppm.

[Rh<sub>2</sub>(OAc)(tfa)<sub>3</sub>] with HEWL: t = 2 h  $\delta$  = -75.5 ppm.

Trifluoroacetic Acid (TFA):  $\delta$  = -75.5 ppm.

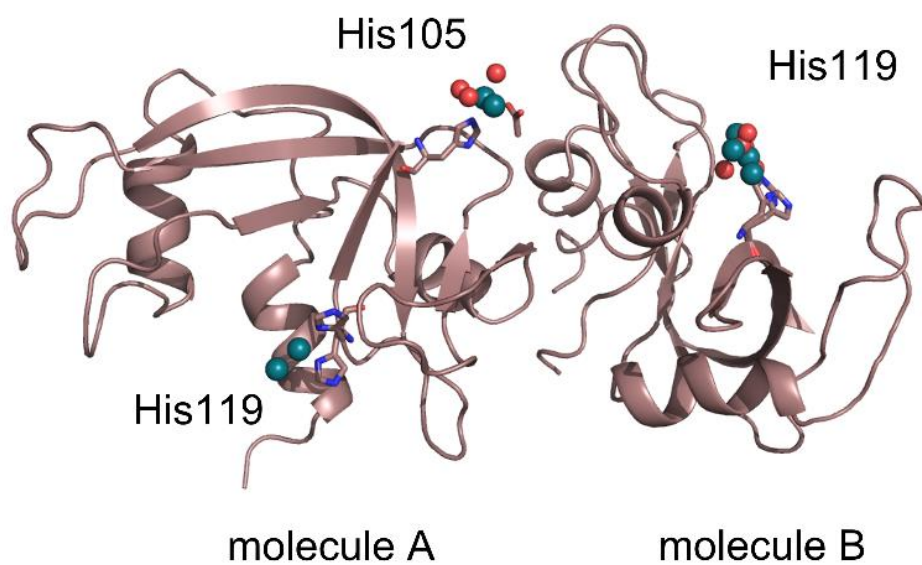

A

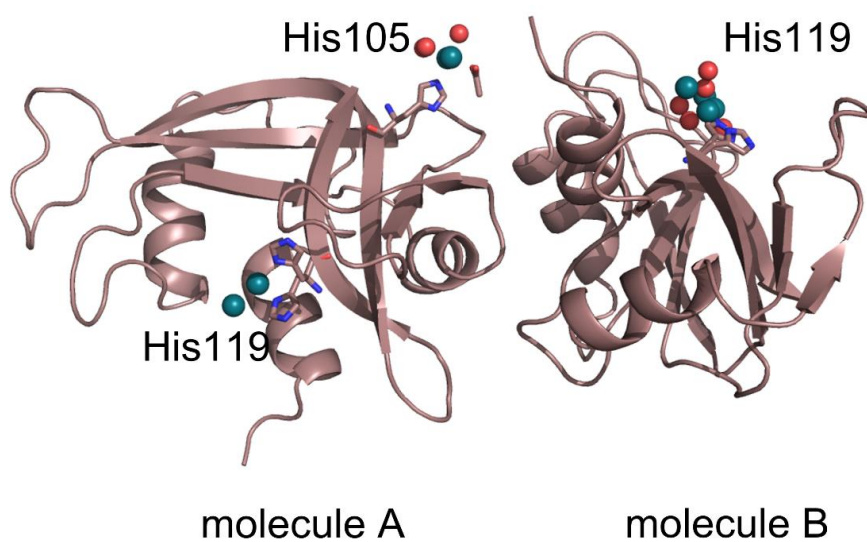

B

**Figure S2.** Overall structure of the two independent RNase A molecules (molecules A and B) in the asymmetric unit of the monoclinic crystal of the adduct formed in the reaction of the protein with  $[\text{Rh}_2(\text{OAc})(\text{tfa})_3]$  (Crystal **1** in panel A and Crystal **2** in panel B). Rh atoms are in dark green.

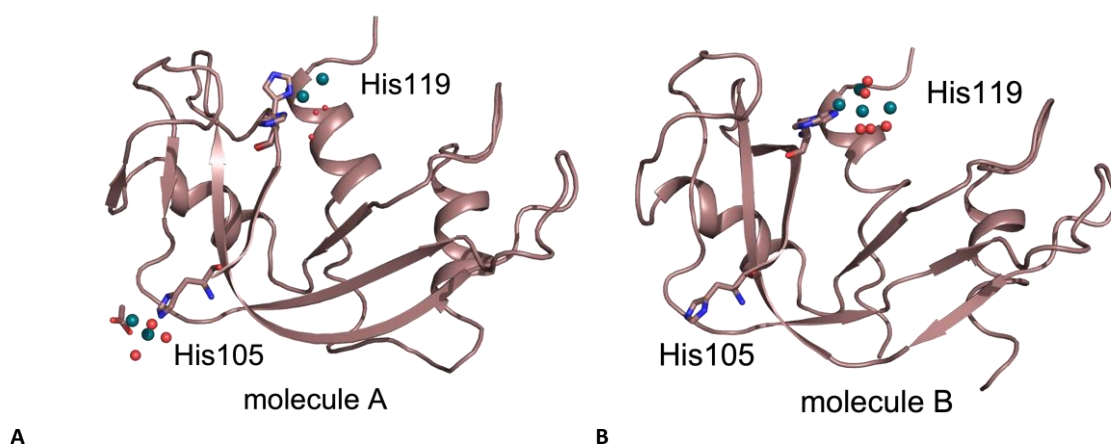

**Figure S3.** Overall structure of the two molecules in the asymmetric unit of the monoclinic crystal of the Rh/RNase A adduct formed upon reaction of the protein with  $[\text{Rh}_2(\text{OAc})(\text{tfa})_3]$  (Crystal 1). The two molecules are shown with the same spatial orientation. Rh atoms are in dark green. In molecule B, residues 18-21 are not included in the model due to conformational disorder.

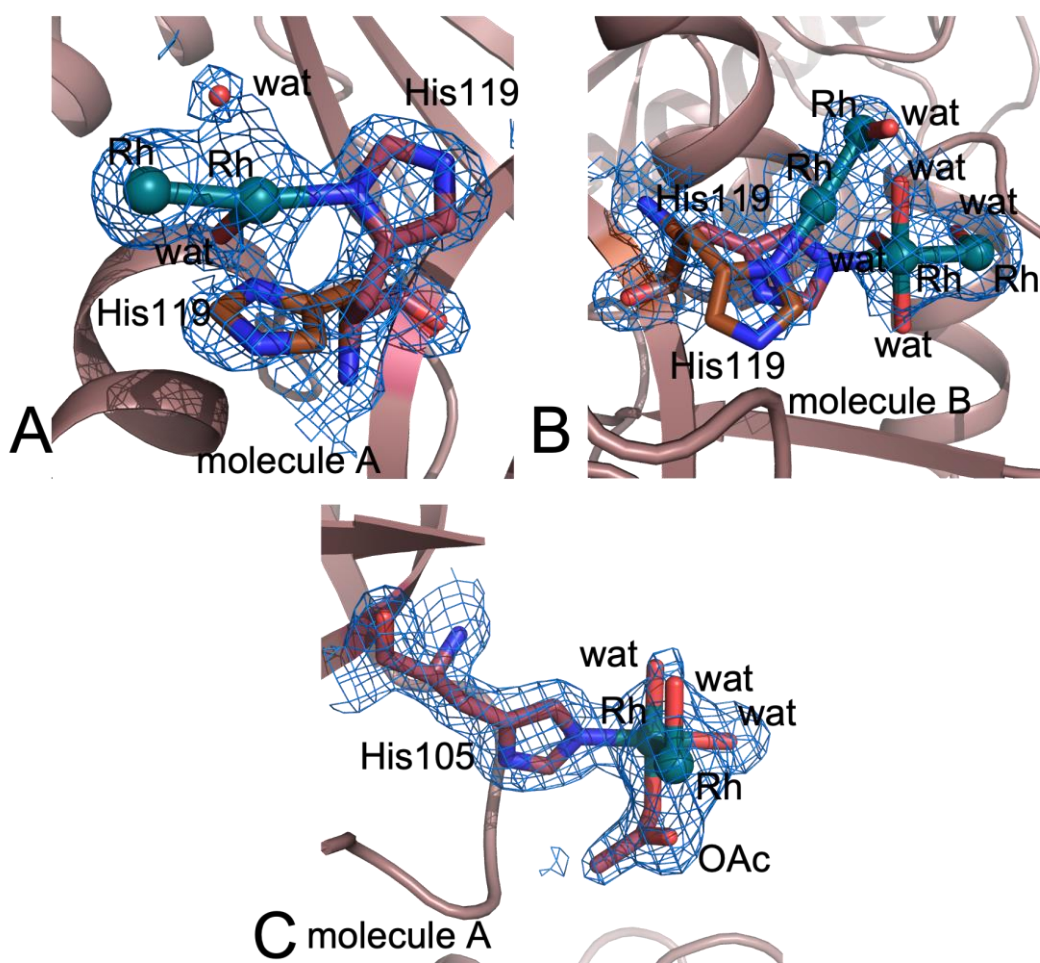

**Figure S4.** Dirhodium core binding site close to (A) His119 of molecule A, (B) His119 of molecule B. (C) His105 of molecule A in the structure of the adduct formed upon reaction of RNase A with  $[\text{Rh}_2(\text{OAc})(\text{tfa})_3]$  (Crystal 2). 2Fo-Fc electron density maps are contoured at 1.0  $\sigma$ .

**Table S1.**

| Crystal              | Comments on the highest difference Fourier (Fo-Fc) electron-density peaks                                                                                                                                                                                                                                                                                                                                                                                                                                                                                                                                                                                                                                                                                                                                                                                                                                                                                                                                                                  | PDB Validation Report assessment (clashscores) |
|----------------------|--------------------------------------------------------------------------------------------------------------------------------------------------------------------------------------------------------------------------------------------------------------------------------------------------------------------------------------------------------------------------------------------------------------------------------------------------------------------------------------------------------------------------------------------------------------------------------------------------------------------------------------------------------------------------------------------------------------------------------------------------------------------------------------------------------------------------------------------------------------------------------------------------------------------------------------------------------------------------------------------------------------------------------------------|------------------------------------------------|
| RNase A<br>Crystal 1 | <p>There are 7 peaks above <math>\pm 5.00\sigma</math>.</p> <p>The first peak, at <math>5.94\sigma</math>, is found between two water molecules which are at <math>3.11 \text{ \AA}</math> distance.</p> <p>The second peak, at <math>5.76\sigma</math>, is too close to a water molecule.</p> <p>The peak at <math>5.30\sigma</math> is too close to the metal complex in proximity of His119 side chain of molecule A.</p> <p>The peak at <math>5.25\sigma</math> is too close to S atom of Cys26 of molecule B, and could be due to X-ray radiation damage.</p> <p>There are two peaks at <math>5.01\sigma</math> which are both too close to the metal complex but in two different regions of the protein: a peak is close to His119 side chain of the molecule A while the other lies in proximity of His105 side chain in the molecule A.</p> <p>Finally, there is a peak at <math>5.00\sigma</math>, that is close to O atom of Ala20 of molecule A, i.e. close to a residue located in a very flexible region of the protein.</p> | Clashscore 7.                                  |
| RNase A<br>Crystal 2 | <p>There are 6 peaks above <math>\pm 5.00\sigma</math>. They range from <math>10.82\sigma</math> to <math>5.36\sigma</math>.</p> <p>Four peaks, at <math>10.82\sigma</math>, <math>5.96\sigma</math>, <math>5.63\sigma</math> and <math>5.66\sigma</math>, are all too close to ligands of the metal complex, in particular:</p> <ul style="list-style-type: none"><li>- <math>10.82\sigma</math>. Close to His105 side chain of the molecule A;</li><li>- <math>5.96\sigma</math> and <math>5.63\sigma</math>. Close to His119 side chain of</li></ul>                                                                                                                                                                                                                                                                                                                                                                                                                                                                                    | Clashscore 4.                                  |

|      |                                                                                                                                                                                                                                                                                                                                                                          |               |
|------|--------------------------------------------------------------------------------------------------------------------------------------------------------------------------------------------------------------------------------------------------------------------------------------------------------------------------------------------------------------------------|---------------|
|      | <p>the molecule A;</p> <ul style="list-style-type: none"> <li>- 5.36σ. Close to His119 side chain of the molecule B.</li> </ul> <p>The peak at 5.93σ is found too close to the O atom of Ser21 of molecule A. This is a very flexible region of the protein. Finally, there are two peaks at 5.36σ, that are both too close to water molecules.</p>                      |               |
| HEWL | <p>There are 4 peaks above <math>\pm 5.00\sigma</math>.</p> <p>The first two peaks, at 7.41σ and 6.30σ, are too close to water molecules.</p> <p>A negative peak at 5.51σ is present in proximity of sulphate moiety of the HEPES molecule.</p> <p>The last peak at 5.43σ lies between the O atoms of C-terminal tails of the protein and one of its symmetry mates.</p> | Clashscore 9. |

**Table S2.** Rmsd obtained by superimposition of Ca of [Rh<sub>2</sub>(OAc)(tfa)<sub>3</sub>]/RNase A structures each other and with the structures of [*cis*-Rh<sub>2</sub>(OAc)<sub>2</sub>(tfa)<sub>2</sub>]/RNase A adduct, [Rh<sub>2</sub>(OAc)<sub>4</sub>]/RNase A adduct and the metal-free protein.

|            | Crystal 1  |            | Crystal 2  |            | 7QPW       |            | 7QQ0       |            | 7QPY       |            | 7QPZ       |            | 6XVX       |            | 1JVT       |            |
|------------|------------|------------|------------|------------|------------|------------|------------|------------|------------|------------|------------|------------|------------|------------|------------|------------|
|            | Molecule A | Molecule B |
| Crystal 1  |            |            |            |            |            |            |            |            |            |            |            |            |            |            |            |            |
| Molecule A | 0          | 0.269      | 0.170      | 0.332      | 0.134      | 0.295      | 0.243      | 0.293      | 0.210      | 0.329      | 0.120      | 0.298      | 0.338      | 0.157      | 0.221      | 0.330      |
| Molecule B |            | 0          | 0.392      | 0.153      | 0.348      | 0.114      | 0.429      | 0.147      | 0.357      | 0.174      | 0.324      | 0.120      | 0.139      | 0.349      | 0.318      | 0.210      |
| Crystal 2  |            |            |            |            |            |            |            |            |            |            |            |            |            |            |            |            |
| Molecule A |            |            | 0          | 0.429      | 0.117      | 0.420      | 0.102      | 0.438      | 0.118      | 0.409      | 0.146      | 0.383      | 0.443      | 0.109      | 0.237      | 0.388      |
| Molecule B |            |            |            | 0          | 0.417      | 0.130      | 0.448      | 0.123      | 0.421      | 0.088      | 0.377      | 0.108      | 0.099      | 0.404      | 0.377      | 0.187      |

**Table S3.** Rh-containing fragments found in the three structures of Rh/protein adducts obtained upon reaction of [Rh<sub>2</sub>(OAc)(TFA)<sub>3</sub>] with RNase A or HEWL. The Rh ligands identified in each binding site are described. Values in parentheses refer to the occupancy of metal and ligands.

| Rh/RNase A adduct binding site                                          | Metal and Ligands in structure 1                                                                                                                                                                                                                       | Metal and Ligands in structure 2                                                                                                                                                                                                                       |
|-------------------------------------------------------------------------|--------------------------------------------------------------------------------------------------------------------------------------------------------------------------------------------------------------------------------------------------------|--------------------------------------------------------------------------------------------------------------------------------------------------------------------------------------------------------------------------------------------------------|
| His119 of molecule A (His in double conformation in structures 1 and 2) | Rh (0.40)<br>Rh (0.40)                                                                                                                                                                                                                                 | Rh (0.55)<br>Rh (0.55)                                                                                                                                                                                                                                 |
| His119 of molecule B (His in double conformation in structure 1 and 2)  | Rh (0.20) (d.c.)<br>Rh (0.20) (d.c.)<br>Rh (0.40) (d.c.)<br>Rh (0.40) (d.c.)<br>H <sub>2</sub> O (0.20) (d.c.)<br>H <sub>2</sub> O (0.40) (d.c.)<br>H <sub>2</sub> O (0.40) (d.c.)<br>H <sub>2</sub> O (0.40) (d.c.)<br>H <sub>2</sub> O (0.40) (d.c.) | Rh (0.55) (d.c.)<br>Rh (0.55) (d.c.)<br>Rh (0.30) (d.c.)<br>Rh (0.30) (d.c.)<br>H <sub>2</sub> O (0.55) (d.c.)<br>H <sub>2</sub> O (0.55) (d.c.)<br>H <sub>2</sub> O (0.55) (d.c.)<br>H <sub>2</sub> O (0.55) (d.c.)<br>H <sub>2</sub> O (0.30) (d.c.) |
| His105 of molecule A                                                    | Rh (0.50)<br>Rh (0.50)<br>OAc (0.50)<br>H <sub>2</sub> O (0.50)<br>H <sub>2</sub> O (0.50)<br>H <sub>2</sub> O (0.50)                                                                                                                                  | Rh (0.70)<br>Rh (0.70)<br>OAc (0.70)<br>H <sub>2</sub> O (0.70)<br>H <sub>2</sub> O (0.70)<br>H <sub>2</sub> O (0.70)                                                                                                                                  |
| His105 of molecule B                                                    | /                                                                                                                                                                                                                                                      | /                                                                                                                                                                                                                                                      |
| Rh/HEWL adduct binding site                                             | Metal and Ligands in the structure                                                                                                                                                                                                                     |                                                                                                                                                                                                                                                        |
| His15                                                                   | Rh (0.25)<br>Rh (0.25)                                                                                                                                                                                                                                 |                                                                                                                                                                                                                                                        |
| Lys33                                                                   | Rh (0.30)<br>H <sub>2</sub> O (0.30)                                                                                                                                                                                                                   |                                                                                                                                                                                                                                                        |
| Asp101                                                                  | Rh (0.25)<br>H <sub>2</sub> O (0.25)                                                                                                                                                                                                                   |                                                                                                                                                                                                                                                        |
| Leu129                                                                  | Rh (0.30)<br>Rh* (0.30)                                                                                                                                                                                                                                |                                                                                                                                                                                                                                                        |

d.c.=double conformation

**Table S3.** Geometric parameters of the Rh-containing fragments in the structures of Rh/RNase A adducts here refined.

| Crystal                                                                          | Rh/RNase A adducts                       |         |         |         |         |
|----------------------------------------------------------------------------------|------------------------------------------|---------|---------|---------|---------|
|                                                                                  |                                          | His119A | His119B | His105A | His105B |
| <b>1</b>                                                                         | Rh—N <sub>ax</sub> <sup>a</sup> (Å)      | 2.28    | 2.23    | /       |         |
|                                                                                  | Rh—N <sub>eq</sub> (Å)                   | 2.19    | /       | 2.03    |         |
|                                                                                  | Rh—Rh <sup>a</sup> (Å)                   | 2.28    | 2.45    | 2.37    |         |
|                                                                                  | Rh—O <sub>OAc</sub> (Å)                  | /       | /       | 2.10    |         |
|                                                                                  | Rh—O <sub>wat</sub> <sup>a</sup> (Å)     | /       | 2.10    | 2.11    | /       |
|                                                                                  | O <sub>OAc</sub> —Rh—N (°)               | /       | /       | 94.3    |         |
|                                                                                  | N <sub>ax</sub> —Rh—Rh <sup>a</sup> (°)  | 174.3   | 172.5   | /       |         |
|                                                                                  | N <sub>eq</sub> —Rh—Rh (°)               | 94.7    | /       | 99.8    |         |
|                                                                                  | O <sub>wat</sub> —Rh—Rh <sup>a</sup> (°) | /       | 88.8    | 86.8    |         |
|                                                                                  |                                          |         |         |         |         |
| <b>2</b>                                                                         | Rh—N <sub>ax</sub> <sup>a</sup> (Å)      | 2.31    | 2.16    | /       |         |
|                                                                                  | Rh—N <sub>eq</sub> (Å)                   | 2.01    | /       | 2.15    |         |
|                                                                                  | Rh—Rh <sup>a</sup> (Å)                   | 2.53    | 2.47    | 2.29    |         |
|                                                                                  | Rh—O <sub>OAc</sub> (Å)                  | /       | /       | 2.13    |         |
|                                                                                  | Rh—O <sub>wat</sub> <sup>a</sup> (Å)     | /       | 2.10    | 2.12    | /       |
|                                                                                  | O <sub>OAc</sub> —Rh—N (°)               | /       | /       | 89.6    |         |
|                                                                                  | N <sub>ax</sub> —Rh—Rh <sup>a</sup> (°)  | 170.7   | 171.4   | /       |         |
|                                                                                  | N <sub>eq</sub> —Rh—Rh (°)               | 92.5    | /       | 100.4   |         |
|                                                                                  | O <sub>wat</sub> —Rh—Rh <sup>a</sup> (°) | /       | 90.6    | 83.9    |         |
|                                                                                  |                                          |         |         |         |         |
| <b>Structure of the<br/>[Rh<sub>2</sub>(OAc)<sub>4</sub>]/RNase A<br/>adduct</b> | Rh—N (Å)                                 | 2.16    | 2.27    | 2.20    | 2.18    |
|                                                                                  | Rh—Rh (Å)                                | 2.34    | 2.37    | 2.42    | 2.42    |
|                                                                                  | Rh—O <sub>OAc</sub> <sup>a</sup> (Å)     | 2.09    | 2.11    | 2.06    | 2.13    |
|                                                                                  | Rh—O <sub>TFA</sub> <sup>a</sup> (Å)     | /       | /       | /       | /       |
|                                                                                  | Rh—O <sub>wat</sub> <sup>a</sup> (Å)     | 2.24    | 2.28    | 2.29    | 2.28    |
|                                                                                  | O <sub>OAc</sub> —Rh—N <sup>a</sup> (°)  | 93.7    | 93.9    | 94.4    | 92.5    |
|                                                                                  | O <sub>TFA</sub> —Rh—N <sup>a</sup> (°)  | 90.9    | 91.9    | 91.1    | 93.3    |
|                                                                                  | N—Rh—Rh (°)                              | 177.1   | 175.4   | 176.3   | 176.6   |
|                                                                                  | O <sub>wat</sub> —Rh—Rh <sup>a</sup> (°) | 90.1    | 88.0    | 88.9    | 87.3    |
|                                                                                  |                                          |         |         |         |         |

<sup>a</sup>Average values. Standard deviations for the distances are in the range of 0.01-0.08Å. Standard deviations for the angles are in the range of 1.2-8.8 °. 'wat' in the table refers only to water coordinating Rh atoms at equatorial positions.

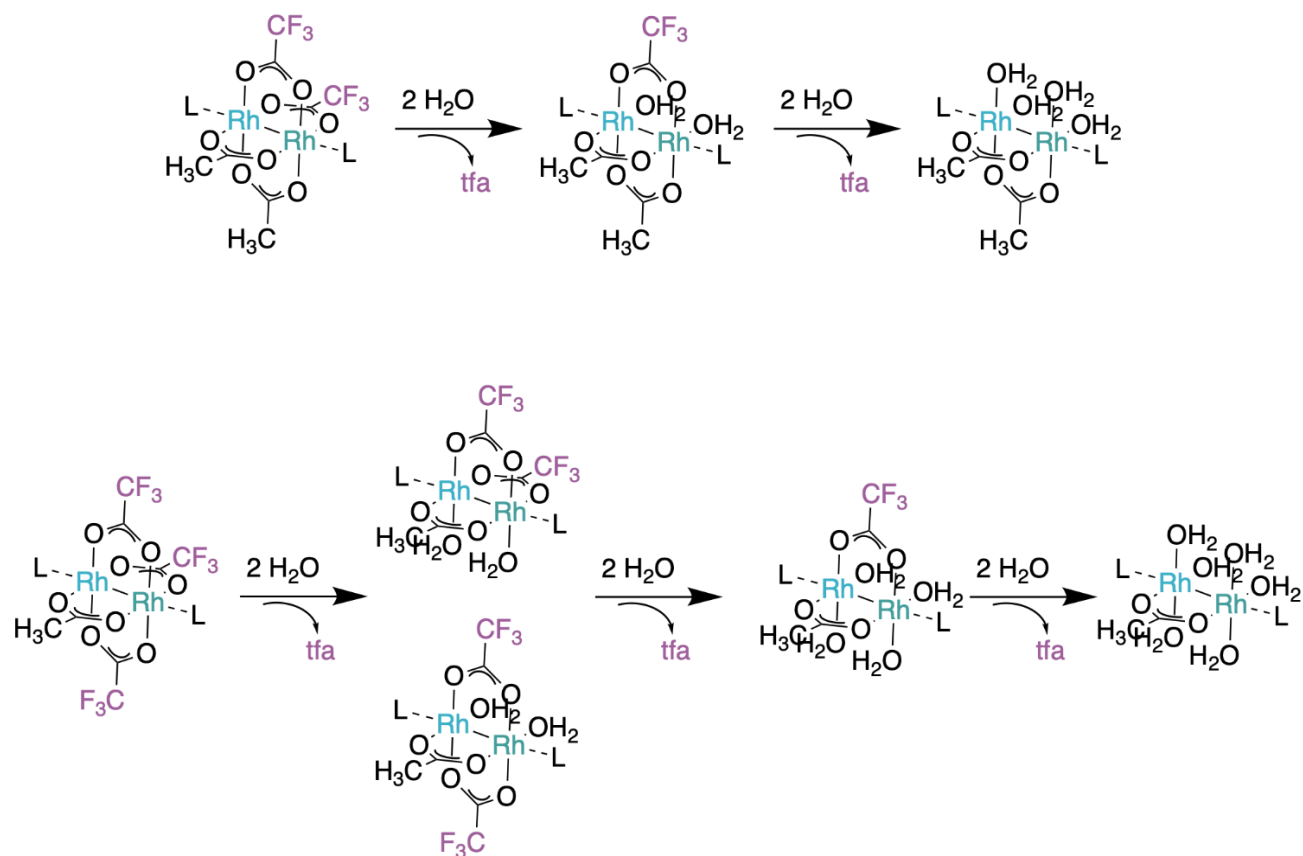

**Scheme S2.** Hydrolytic pathway of  $[cis\text{-Rh}_2(\text{OAc})_2(\text{tfa})_2]$  and  $[\text{Rh}_2(\text{OAc})(\text{tfa})_3]$ .

[1] Y. Lou, T.P. Remarchuk, E.J. Corey. Catalysis of Enantioselective [2+1]-Cycloaddition Reactions of Ethyl Diazoacetate and Terminal Acetylenes Using Mixed Ligand Complexes of the Series  $\text{Rh}_2(\text{RCO}_2)_n$  ( $L^{*4-n}$ ). Stereochemical Heuristics for Ligand Exchange and Design for Catalyst Synthesis. *J. Am. Chem. Soc.* 2005, 127, 14223–14230.

[2] Loreto, D.; Esposito, A.; Demitri, N.; Guaragna, A.; Merlino, A. Reactivity of a Fluorine-Containing Dirhodium Tetracarboxylate Compound with Proteins. *Dalton Trans.* **2022**, 51, 3695–3705.
